# Supplementary material for: Easy access to nitrogen-doped mesoporous interlinked carbon/NiO nanosheet for application in lithium-ion batteries and supercapacitors
Source: Royal Society of Chemistry journal article supplement (doi:10.1039/c5ra19155f), 2015-01-01
Supplement: c5ra19155f1.pdf [file c5ra19155f1.pdf]

## Supplementary Materials

### **Easy Access to Nitrogen-Doped Mesoporous Interlinked Carbon/NiO Nanosheet for application in lithium-ion batteries and supercapacitors**

Yuan Xia, Beibei Wang, Gang Wang, Hui Wang \*

*Key Laboratory of Synthetic and Natural Functional Molecule Chemistry (Ministry of  
Education), College of Chemistry & Materials Science, Northwest University, Xi'an  
710069, PR China*

\*Corresponding author:

Tel.: +86 029 88363115

Fax: +86 029 88303798

E-mail address: huiwang@nwu.edu.cn (H. Wang).

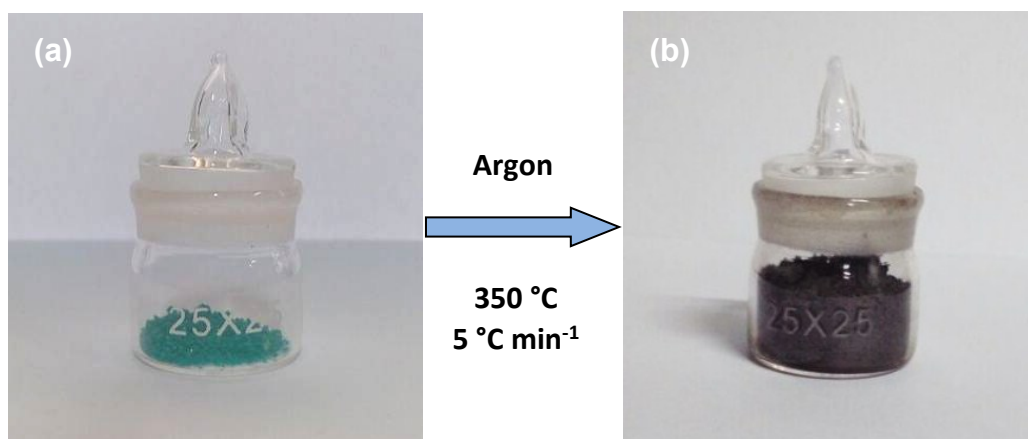

**Figure S1** Photographs of (a) the precursor Ni-ZIF-8 and (b) the product after annealing process.

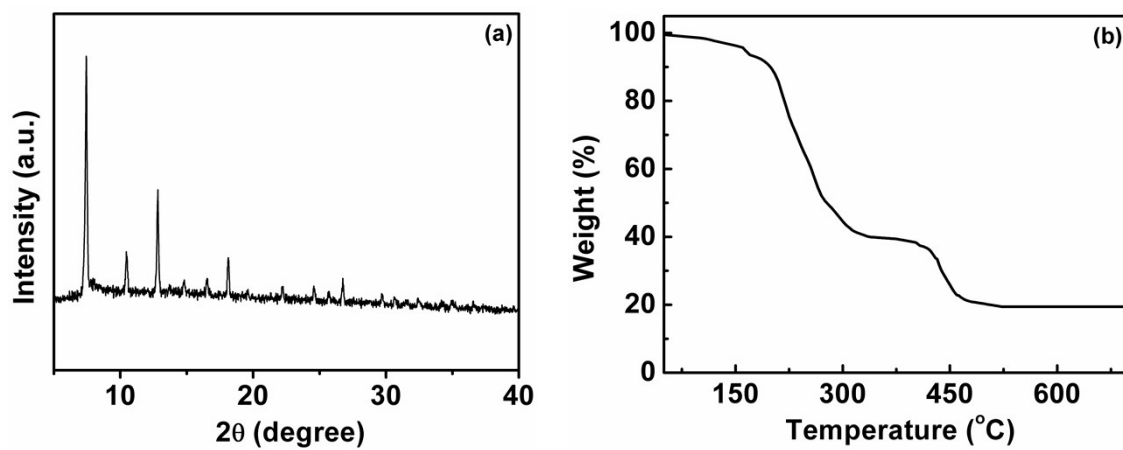

**Figure S2** (a) XRD pattern and (b) TGA curve of Ni-ZIF 8 precursor (at nitrogen atmosphere from 80 to 350  $^{\circ}\text{C}$  and under air atmosphere after 350  $^{\circ}\text{C}$ ).

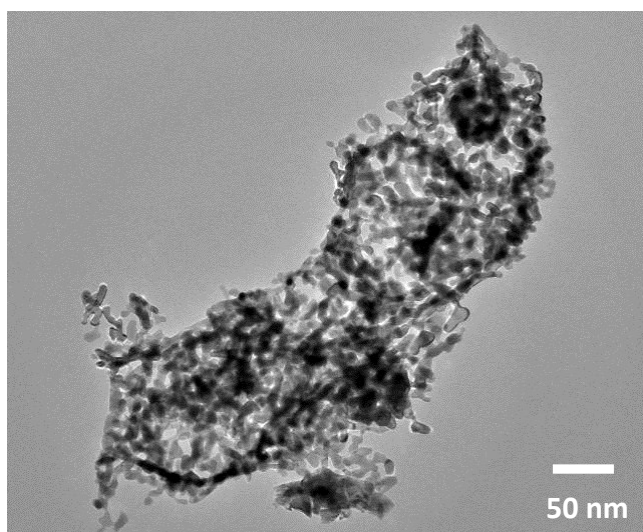

**Figure S3** TEM image of carbon/NiO nanosheet electrode after 300 cycles in LIBs.

**Table S1.** The supercapacitive performance of previously reported carbon or NiO anode materials.

| Materials               | Capacity<br>(F g <sup>-1</sup> ) | cycle<br>number | current<br>density<br>(A g <sup>-1</sup> ) | capacitance<br>retention<br>(%)  | Ref.         |
|-------------------------|----------------------------------|-----------------|--------------------------------------------|----------------------------------|--------------|
| Carbon/NiO Nanosheet    | 414                              | 3000            | 5                                          | 92.2                             | This<br>work |
| Nitrogen-doped Carbon   | 198                              | 10000           | 2                                          | 92                               | [49]         |
| Carbon Networks         | 295                              | 5000            | 0.5                                        | 97                               | [50]         |
| NiO@MnO <sub>2</sub>    | 86.3                             | 10000           | 4 A                                        | 98.3                             | [51]         |
| 3D flower-like NiO@PPy  | 595                              | 1000            | 1                                          | 80.7                             | [52]         |
| NiO nanoflakes/graphene | 240                              | 1500            | 5                                          | 120                              | [53]         |
| graphene/NiO nanosheets | 525                              | 1000            | 0.2                                        | 95.4                             | [54]         |
| 8 nm NiO nanoparticles  | 379                              | 1000            | 0.1                                        | 60.6<br>(at 2A g <sup>-1</sup> ) | [55]         |
| NiO nanoparticles       | 377                              | 3750            | 5                                          | 62                               | [56]         |
| NiO                     | 273                              | 1500            | 0.6                                        | 88                               | [57]         |
| NiO/polymer CNTs        | 415                              | 2000            | 6                                          | 83                               | [58]         |

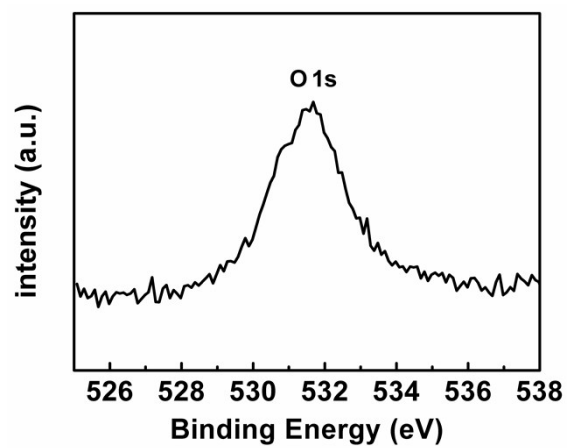

**Figure S4** XPS spectrum O 1s for C/NiO nanosheet.
